## Prognostic value of intracoronary imaging-derived measures for non-infarct related vessel revascularization throughout 7 years among patients with ST-elevation myocardial infarction

Y. Ueki<sup>1</sup>, A. Karagiannis<sup>2</sup>, S. Bar<sup>1</sup>, K. Yamaji<sup>1</sup>, M. Taniwaki<sup>1</sup>, M. Roffi<sup>3</sup>, L. Holmvang<sup>4</sup>, R. Maldonado<sup>1</sup>, G. Pedrazzini<sup>5</sup>, H. Kelbaek<sup>6</sup>, M. Radu<sup>4</sup>, S. Windecker<sup>1</sup>, L. Raber<sup>1</sup>

<sup>1</sup>University Hospital, Bern, Switzerland; <sup>2</sup>Preventive Cardiology & Sports Medicine, Inselspital Bern, Bern, Switzerland; <sup>3</sup>Geneva University Hospitals, Geneva, Switzerland; <sup>4</sup>Rigshospitalet - Copenhagen University Hospital, Copenhagen, Denmark; <sup>5</sup>Cardiocentro Ticino, Lugano, Switzerland; <sup>6</sup>Zealand University Hospital, Roskilde, Denmark

**Funding Acknowledgement:** Type of funding source: Public grant(s) – National budget only. Main funding source(s): Swiss National Science Foundation

**Background:** Underlying plaque characteristics that lead to future revascularization during long-term follow-up remain poorly understood.

**Purpose:** We aimed to explore intracoronary imaging-derived measures as assessed by intravascular ultrasound (IVUS) and optical coherence tomography (OCT) associated with non-infarct related vessel revascularization (non-TVR) arising from imaged segments during long-term (up to 7 years) follow-up among patients with ST-elevated myocardial infarction (STEMI).

**Methods:** A total of 94 STEMI patients enrolled into the IBIS-4 (Integrated Biomarker Imaging Study-4) study undergoing serial (baseline and 13 months) IVUS and OCT in 2 non-infarct-related coronary arteries under high-intensity statin therapy were analyzed in the present study. Patients were divided into 2 groups according to the occurrence of non-TVR within previously imaged vessel segments (non-TVR: n=14, no non-TVR: n=80).

**Results:** Baseline characteristics including LDL level were comparable between groups. At baseline, lesions with future non-TVR were associated with greater percent atheroma volume by IVUS ( $55.6 \pm 5.4\%$  vs.  $49.6 \pm 6.1\%$ ,  $P < 0.001$ ), minimum lumen area by OCT ( $3.4 \pm 1.7 \text{ mm}^2$  vs.  $6.0 \pm 3.3 \text{ mm}^2$ ,  $P = 0.004$ ), and a higher prevalence of fibroatheroma ( $60.0\%$  vs.  $20.1\%$ ,  $P = 0.007$ ) by OCT compared with those without. Among patients with serial imaging, lesions with non-TVR had a trend towards a less reduction of percent atheroma volume ( $-0.2 \pm 3.8\%$  vs.  $-2.4 \pm 4.2\%$ ,  $P = 0.083$ ).

**Conclusion:** Greater plaque burden, smaller lumen area, and higher prevalence of OCT-detected fibroatheroma at baseline were associated with non-infarct related vessel revascularization. Lesions with non-TVR tend to have less-pronounced regression of coronary atheroma despite intensive statin therapy and achieved LDL levels.

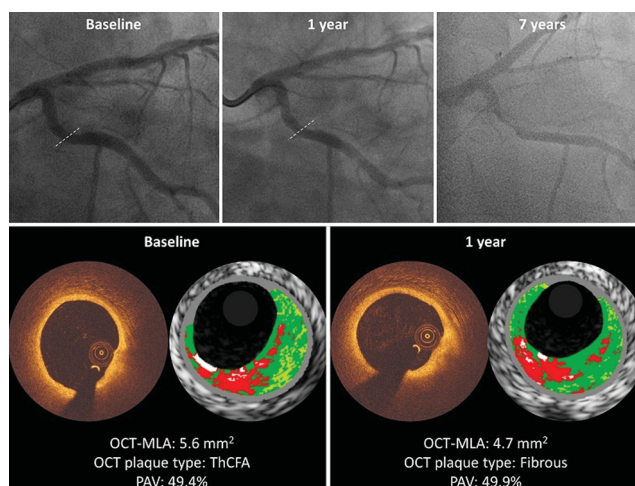

Non-TVR 7 years after index PCI
